# Supplementary material
Source: PubMed Central journal article supplement (PMC6435437)
Supplement: NIHMS1522847-supplement-2.pdf [file NIHMS1522847-supplement-2.pdf]

**Table S1. Primer sequences used for real-time quantitative RT-PCR**

| <b>Target cDNA</b> | <b>Forward sequence (5'-3')</b> | <b>Reverse sequence (5'-3')</b> |
|--------------------|---------------------------------|---------------------------------|
| <i>β-actin</i>     | GGCTGTATTCCCCTCCATCG            | CCAGTTGGTAACAATGCCATGT          |
| <i>Ho1</i>         | AAGCCGAGAATGCTGAGTTCA           | GCCGTGTAGATATGGTACAAGGA         |
| <i>Nqo1</i>        | AGGATGGGAGGTACTIONCGAATC        | AGGCGTCCTTCCTTATATGCTA          |
| <i>Gclc</i>        | GGGGTGACGAGGTGGAGTA             | GTTGGGGTTTGTCTCTCCC             |
| <i>Gclm</i>        | AGGAGCTTCGGGACTGTATCC           | GGGACATGGTGCATTCCAAAA           |
| <i>Srx</i>         | ATCGTGGTGCTGGATTGATTC           | CACCCCAGAGATAAGATTACCCA         |
| <i>Gsr</i>         | GACACCTCTTCCTTCGACTACC          | CCCAGCTTGTGACTCTCCAC            |
| <i>Nfatc1</i>      | GACCCGGAGTTCGACTTCG             | TGACACTAGGGGACACATAACTG         |
| <i>c-Fos</i>       | CGGGTTTCAACGCCGACTA             | TTGGCACTAGAGACGGACAGA           |
| <i>Tnfa</i>        | CCCTCACACTCAGATCATCTTCT         | GCTACGACGTGGGCTACAG             |
| <i>Trap</i>        | AGCAGCCAAGGAGGACTACGTT          | TCGTTGATGTCGCACAGAGG            |
| <i>Mmp9</i>        | AATCTCTTCTAGAGACTGGGAAGGAG      | AGCTGATTGACTAAAGTAGCTGGA        |
| <i>Ctsk</i>        | AGGGAAGCAAGCACTGGATA            | GCTGGCTGGAATCACATCTT            |

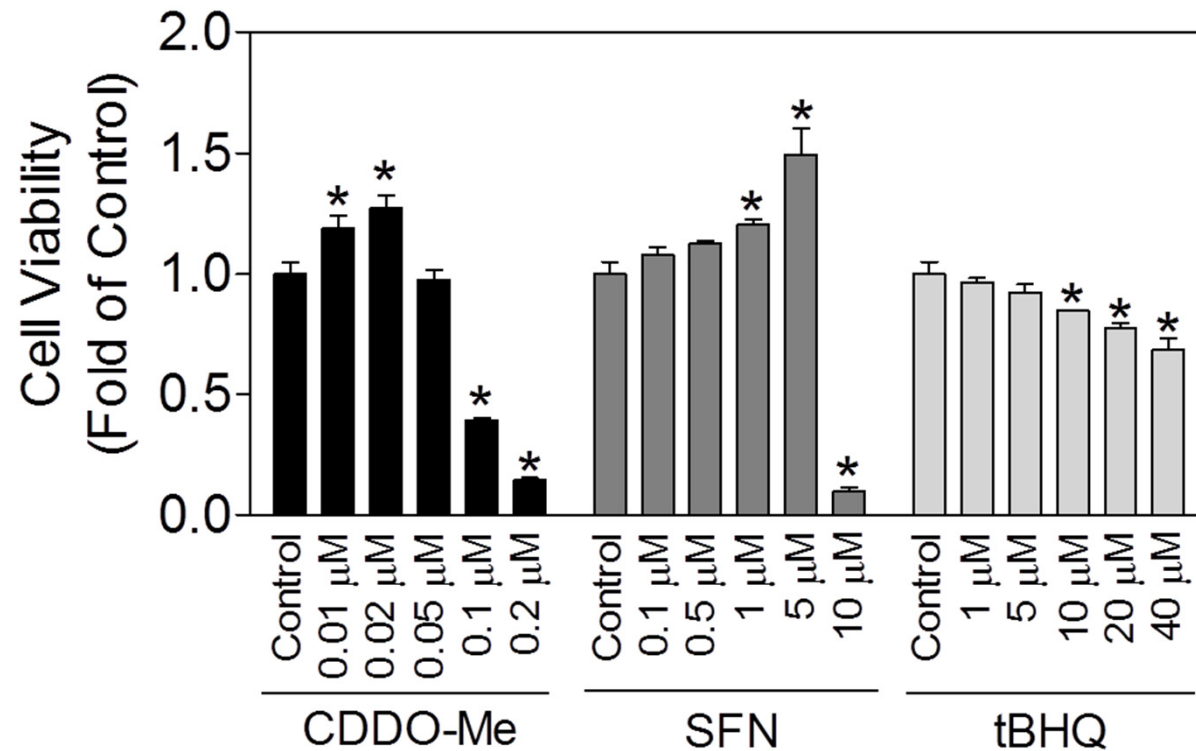

**Fig. S1. Evaluation of cell viability.** RAW cells were grown as described in Methods and were exposed to various concentrations of CDDO-Me, SFN, and tBHQ in DMEM with 10% FBS for 5 days, followed immediately by cell viability measurements. Control (normal culture medium); n = 3-6; \*p < 0.05 vs. Cont.

A

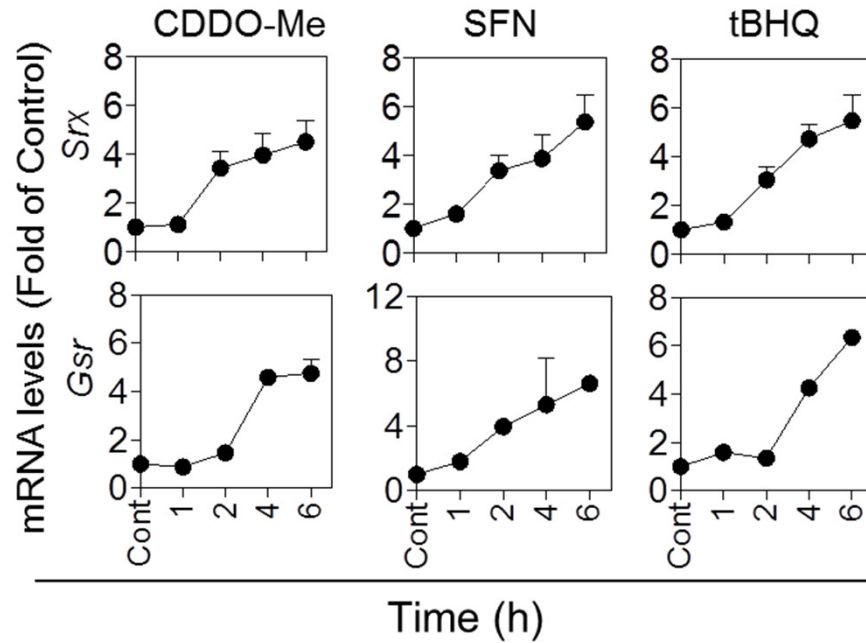

B

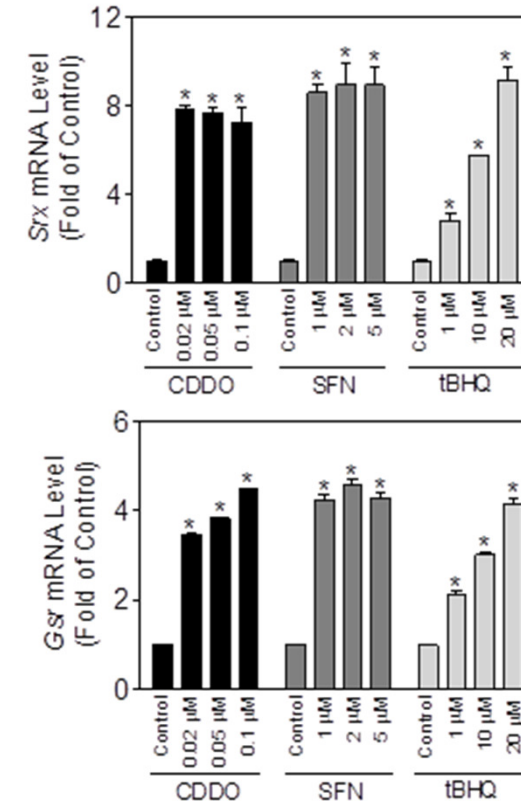

**Fig. S2. CDDO-Me, SFN, and tBHQ stimulate the expression of SRX and GSR in time- and concentration-dependent manners.** (A) In the time-response study, the RAW cells were treated with single concentrations of CDDO (0.01 µM), SFN (5 µM), and tBHQ (10 µM) for the indicated time points (1, 2, 4 and 6 h). Then the mRNA were extracted, and the gene expressions of GSR and SRX were measured by RT-qPCR. (B) In the concentration-response study, the RAW cells were treated with various of concentrations of CDDO-Me, SFN, and tBHQ for 6 h. Then the mRNA were extracted, and the gene expressions of GSR and SRX were measured by RT-qPCR. All results were normalized to β-Actin. Cont, Control (normal culture medium); n = 3. \*p < 0.05 vs. Cont.

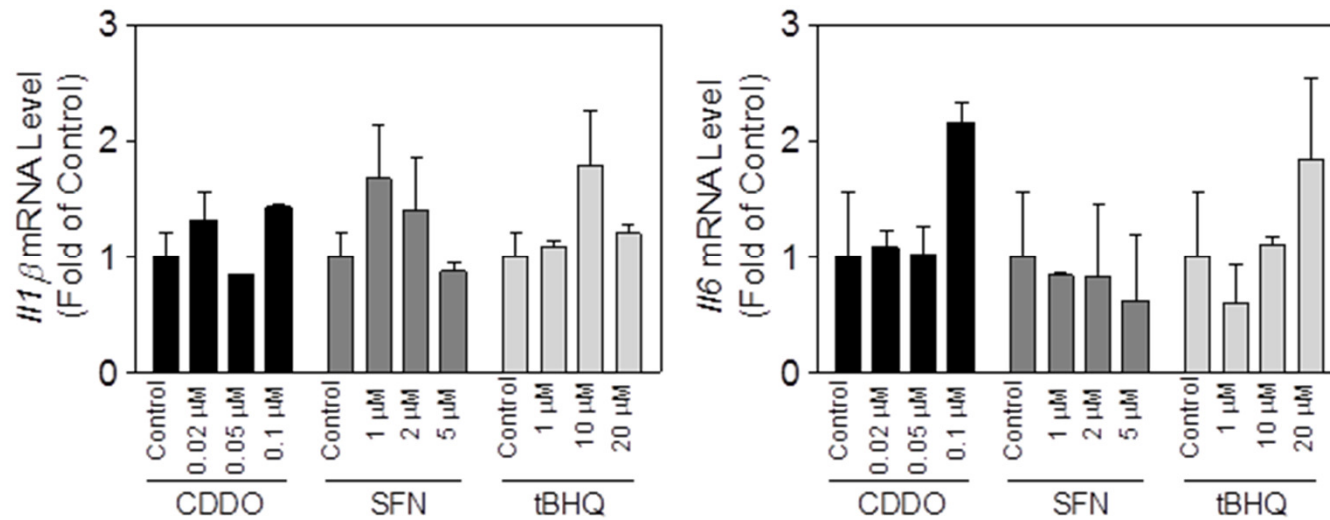

**Fig. S3. The gene expression of IL1 $\beta$ , IL6, TXN, and TXNRD1 in CDDO-Me, SFN, and tBHQ treated cells.** The RAW cells were treated with various concentrations of CDDO-Me, SFN, and tBHQ for 6 h. The mRNA were extracted, and the inflammatory gene expressions of IL1 $\beta$  and IL6 were measured by RT-qPCR. All results were normalized to  $\beta$ -Actin. Vehicle (normal culture medium); n = 3. \*p < 0.05 vs. Vehicle.
